1 ***Arfgef1* haploinsufficiency in mice alters neuronal endosome composition and decreases**  
2 **membrane surface postsynaptic GABA<sub>A</sub> receptors**

3 JiaJie Teoh<sup>1</sup>, Narayan Subramanian<sup>1,8</sup>, Maria Elena Pero<sup>3,7</sup>, Francesca Bartolini<sup>3</sup>, Ariadna  
4 Amador<sup>1</sup>, Ayla Kanber<sup>1</sup>, Damian Williams<sup>1</sup>, Sabrina Petri<sup>1</sup>, Mu Yang<sup>1</sup>, Andrew S. Allen<sup>5</sup>, Jules  
5 Beal<sup>6</sup>, Sheryl R. Haut<sup>6</sup>, Wayne N. Frankel<sup>1,2</sup>

6 <sup>1</sup>Institute for Genomic Medicine, <sup>2</sup>Department of Genetic and Development, <sup>3</sup>Department of  
7 Pathology & Cell Biology, <sup>4</sup>Irving Cancer Research Center, Columbia University Irving  
8 Medical Center, New York, NY.

9 <sup>5</sup>Department of Biostatistics and Bioinformatics, Duke University, Durham, NC.

10 <sup>6</sup>The Saul R. Korey Department of Neurology, Montefiore Medical Center and Albert Einstein  
11 College of Medicine, Bronx, NY.

12 <sup>7</sup>Department of Veterinary Medicine and Animal Production, University of Naples Federico II,  
13 Naples, Italy.

14 <sup>8</sup>(current address) Department of Electrical and Computer Engineering, University of Florida,  
15 Gainesville, FL.

16

17 **Conflict of Interest**

18 WNF consults for Praxis Precision Medicines, Inc.. JB consults for Upsher-Smith and GW  
19 Pharmaceuticals.

20

## 21 Acknowledgements

22 This research is supported by NIH grant R37 NS031348 to WNF, NIH grant U01HG0009610  
23 to JB and NIH/NIA grant RO1AG050658 to FB. We are grateful to Erin Heinzen-Cox, David  
24 Goldstein, Daniel Lowenstein and the EPGP and Epi4k project teams for bringing the  
25 *ARFGEF1* variant to our attention, to Osasumwen Virginia Aimiwu for support in RNA  
26 reverse transcription and to Ryan Dhindsa for his R script for determining permutation statistics.

27

## 28 Abstract

29 *ARFGEF1* encodes a guanine exchange factor involved in intracellular vesicle trafficking, and  
30 is a candidate gene for childhood genetic epilepsies. To model *ARFGEF1* haploinsufficiency  
31 observed in a recent Lennox Gastaut Syndrome patient, we studied a frameshift mutation  
32 (*Arfgef1*<sup>fs</sup>) in mice. *Arfgef1*<sup>fs/+</sup> pups exhibit signs of developmental delay, and *Arfgef1*<sup>fs/+</sup> adults  
33 have a significantly decreased threshold to induced seizures but do not experience spontaneous  
34 seizures. Histologically, the *Arfgef1*<sup>fs/+</sup> brain exhibits a disruption in the apical lining of the  
35 dentate gyrus and altered spine morphology of deep layer neurons. In primary hippocampal  
36 neuron culture, dendritic surface and synaptic but not total GABA<sub>A</sub> receptors (GABA<sub>A</sub>R) are  
37 reduced in *Arfgef1*<sup>fs/+</sup> neurons with an accompanying decrease in GABA<sub>A</sub>R-containing  
38 recycling endosomes in cell body. *Arfgef1*<sup>fs/+</sup> neurons also display differences in the relative  
39 ratio of Arf6<sup>+</sup>:Rab11<sup>+</sup>:TrfR<sup>+</sup> recycling endosomes. Although the GABA<sub>A</sub>R-containing early  
40 endosomes in *Arfgef1*<sup>fs/+</sup> neurons are comparable to wildtype, *Arfgef1*<sup>fs/+</sup> neurons show an  
41 increase in GABA<sub>A</sub>R-containing lysosomes in dendrite and cell body. Together, the altered  
42 endosome composition and decreased neuronal surface GABA<sub>A</sub>R results suggests a  
43 mechanism whereby impaired neuronal inhibition leads to seizure susceptibility.

## 44 **Highlights**

- 45 1. *Arfgef1*<sup>fs/+</sup> mice have lower seizure threshold but no spontaneous seizure.
- 46 2. *Arfgef1*<sup>fs/+</sup> neurons show reduced dendritic surface GABA<sub>A</sub>R.
- 47 3. *Arfgef1*<sup>fs/+</sup> neurons have decreased GABA<sub>A</sub>R-containing recycling endosome  
48 accompanied with an increase in GABA<sub>A</sub>R-containing lysosomes.

## 49 **Keywords**

50 Lennox-Gastaut Syndrome, Epilepsy, GABA<sub>A</sub> receptor, endocytic cycle.

51

## 52 **Introduction**

53 Epileptic encephalopathy (EE) is a group of brain disorders often with childhood onset and  
54 accompanied by serious neurocognitive consequences (Jain et al., 2013). While linkage and  
55 association studies have suggested that *ARFGEF1* is involved in genetic epilepsy (Wallace et  
56 al., 1996; Piro et al., 2011; Addis et al., 2018), it was one of several candidate genes and no  
57 specific causal *ARFGEF1* variants were indicted previously.

58

59 *ARFGEF1* encodes Brefeldin A (BFA) inhibited guanine-nucleotide-exchange protein-1, also  
60 known as BIG1 (Addis et al., 2018); and is highly conserved across mammals and eukaryotes  
61 (Wright et al., 2014). *Arfgef1* belongs to the GBF/BIG family based on the relatively large  
62 molecular size compared to other ARF-GEFs and a distinctive feature – sensitivity to Brefeldin  
63 A (BFA) (Yamaji et al., 2000). Among multiple domains, the BFA-sensitive Sec7 catalytic  
64 domain is the most studied (Le et al., 2013; Lin et al., 2013; Zhou et al., 2013). *Arfgef1*  
65 selectively activates Class I ARFs to initiate conversion of ARF-GDP to ARF-GTP during the  
66 process of intracellular vesicle formation and trafficking (Zhao et al., 2002). Earlier studies

67 also showed that the N-terminal DCB domain interacts with Arl1, targeting Arfgef1 to the  
68 trans-Golgi network (TGN) membrane (Galindo et al., 2016); the C-terminus interacts with  
69 kinesin and myosin (Saeki et al., 2005; Shen et al., 2008) as well as regulating cell surface  
70 localization of ABCA1 or GABA<sub>A</sub>R (Lin et al., 2013; Li et al., 2014). The role of Arfgef1 in  
71 the TGN has been studied in detail (Manolea et al., 2008; Boal and Stephens, 2010; Lowery et  
72 al., 2013), where it activates Arf1-GTP to recruit clathrin coats, AP1 and Arf binding proteins,  
73 also known as GGAs (Lowery et al., 2013). These vesicle-forming components with cargo-  
74 sorting capability form new vesicles and traffic cargo from TGN to endosomes or plasma  
75 membrane (Shen et al., 2006).

76

77 An earlier study suggested that BIG2 (Arfgef2) is functionally associated with endosomal  
78 integrity whereas Arfgef1 is associated with the Golgi (Shen et al., 2006). However, newer  
79 evidence suggests that Arfgef1 is also localized on endosomes (D'Souza et al., 2014). Since the  
80 main Arfgef1 target, Arl1, localizes on recycling endosomes and regulates trafficking from  
81 recycling endosome to plasma membrane (Nakai et al., 2013) and GGAs are known to facilitate  
82 trafficking between TGN and lysosomes (Hirst et al., 2000), it is reasonable to suggest that  
83 Arfgef1 may have a role in post-TGN endosomal trafficking, similar to that of BIG2. However,  
84 this aspect of Arfgef1 is understudied.

85

86 Arfgef1 regulates neurite development *in vitro* (Zhou et al., 2013). Recently, different groups  
87 demonstrated that Arfgef1 is required both for the survival of cortical deep layer neurons and  
88 for the initiation of neuronal myelination (Teoh et al., 2017; Miyamoto et al., 2018). Another  
89 *in vitro* study showed that decreased Arfgef1 abundance is coupled with decrease of plasma  
90 membrane GABA<sub>A</sub>R without affecting total GABA<sub>A</sub>R, resulting in impaired chloride ion

91 influx (Li et al., 2014). However, it is not yet known directly whether *Arfgef1* has a role in  
92 phenotypes that rely on maintaining inhibition:excitation balance *in vivo*.

93

94 Understanding the underlying disease etiology and mechanisms may provide insight for new  
95 therapies, especially needed for severe childhood epilepsies. Here, we examine the effect of  
96 *Arfgef1* haploinsufficiency in a new mouse line based on a Lennox-Gastaut patient that carries  
97 a *de novo* loss of function mutation in *ARFGEF1*.

98

## 99 **Results**

### 100 ***ARFGEF1* de novo nonsense mutation in a Lennox-Gastaut Syndrome patient.**

101 *ARFGEF1* was detected as a candidate gene in a boy diagnosed with Lennox-Gastaut  
102 Syndrome. Seizures began at 6 months of age, and were subsequently diagnosed as infantile  
103 spasms. By 3 years of age, the patient exhibited generalized convulsions as well as myoclonic,  
104 tonic, and atonic seizures. Neurological exams showed global developmental delay and axial  
105 hypotonia. He had no language and no meaningful vocalizations. He was unable to pull to stand  
106 or support his own weight. General physical exam results were normal and no dysmorphic  
107 features was observed. The electroencephalogram (EEG) initially showed hypsarrhythmia and  
108 infantile spasms. Subsequent EEGs showed the emergence of generalized slow spike-and-wave  
109 activity along with paroxysmal fast activity and persistence of multifocal epileptiform  
110 discharges, superimposed on a high amplitude, disorganized background. He was treated  
111 initially with ACTH, followed by multiple medications including vigabatrin, levetiracetam,  
112 clonazepam, zonisamide, phenobarbital, lamotrigine, valproic acid, and rufinamide. He was  
113 also treated with the ketogenic diet and underwent a corpus callosotomy. Despite these  
114 interventions the seizures remained severely refractory.

115

116 Exome sequencing performed as part of the Epi4k Collaborative (Epi4K Consortium et al.,  
117 2013) revealed a single nucleotide variant resulting in a premature translational stop codon in  
118 exon 30 of the *ARFGEF1* gene (ENST00000262215.3:c.4365C>A; p.Cys1455Ter). The  
119 patient also has a missense mutation in the *BMP2* gene (ENST00000378827.4:c.328C>A;  
120 p.Arg110Ser), classified as “probably damaging” based on a PolyPhen-2 score of 0.968.  
121 However, since *BMP2* variants have not yet been associated with neurological disease in  
122 human or mouse, and because *Arfgefl* null mouse mutants have abnormal brain development  
123 (Teoh et al., 2017), we considered *ARFGEF1* the more likely candidate.

124

### 125 **Genetic analysis of *Arfgefl* haploinsufficiency**

126 We generated an *Arfgefl* knockout mouse line on the C57BL/6NJ strain background by using  
127 CRISPR/Cas9 to target the orthologous region on mouse Chromosome 1 (Fig. 1A; Methods).  
128 Line *Arfgefl*<sup>em3Frk</sup> (shown hereafter as *Arfgefl*<sup>fs</sup>) has a 4-nt frameshift mutation in exon 30,  
129 resulting in a premature termination codon (MQYVMYSPSI\*) closely mimicking the patient’s  
130 mutation. Although heterozygous mice are viable and fertile, all homozygotes died within one  
131 day of birth, similar to a previous report of the *Arfgefl* knockout mouse (Teoh et al., 2017).  
132 The presence of cDNA and protein in whole brain at embryonic day 17.5 was examined using  
133 primer pairs flanking N-terminal DCB domain, Sec7 domain, exon 29-31 (mutation in exon  
134 30) and C-terminal HDS4 domain (Fig. S1). The *Arfgefl* protein was not detected in *Arfgefl*<sup>fs/fs</sup>  
135 whole brain lysate using *Arfgefl* antibodies with N-terminal epitopes (Fig. 1B). In *Arfgefl*<sup>fs/+</sup>  
136 brain, *Arfgefl* protein was lower in abundance than wildtype, consistent with  
137 haploinsufficiency. The brain size of E17.5 embryos from *Arfgefl*<sup>fs/+</sup> were comparable to  
138 wildtype except that the *Arfgefl*<sup>fs/fs</sup> forebrain was notably smaller.

139

### 140 **Developmental delay in *Arfgefl*<sup>fs/+</sup> mouse pups**

141 We studied the impact of the *Arfgef1*<sup>fs/+</sup> genotype in mouse pups, to explore parallels with the  
142 Lennox-Gastaut Syndrome patient. Newborn pups are known to perform typical behavioral  
143 activities that serve as benchmarks for neurodevelopmental delay during postnatal  
144 development (Hill et al., 2008). *Arfgef1*<sup>fs/+</sup> pup body weight did not change significantly from  
145 postnatal day (PND) 3 to PND11 (Fig. 2A), suggesting that the feeding behavior was normal.  
146 However, in the first week the latency was increased modestly for several tasks, including  
147 surface righting reflex and negative geotaxis (Fig. 2B, C), while the vertical screen holding was  
148 similar to wildtype (Fig. 2D, E). This is consistent with the hypotonia phenotype found in the  
149 patient. Pups younger than PND12 emit ultrasonic vocalization (USV) when separated from  
150 dam and littermates (Ferhat et al., 2016). The USV calls in wildtype pups peaked at PND6 and  
151 then gradually diminished. In contrast, the peak and diminishment of USV calls was  
152 significantly delayed in *Arfgef1*<sup>fs/+</sup> (Fig. 2F). This indicates developmental delay and is  
153 consistent with what was seen in patient. Representative samples of USV calls from wildtype  
154 and *Arfgef1*<sup>fs/+</sup> pups are shown in Fig.S2.

155

### 156 **Morphological defects in *Arfgef1*<sup>fs/+</sup> brains and neurons**

157 An earlier study showed that the *Arfgef1* knockout heterozygotes have normal brain size during  
158 embryogenesis (Teoh et al., 2017), but the postnatal brain was not examined. First, we observed  
159 that *Arfgef1*<sup>fs/+</sup> mice showed transient weight loss by PND14, and catch-up to wildtype by  
160 PND45 (Fig. 3A). Using this as a guide for histological examination, we then compared  
161 *Arfgef1*<sup>fs/+</sup> and wildtype brain at PND14, PND30 and PND45 (Fig. 3B). The overall brain size  
162 of *Arfgef1*<sup>fs/+</sup> was similar to wildtype, but dysregulated growth in the dentate gyrus lining of  
163 *Arfgef1*<sup>fs/+</sup> hippocampus was apparent from PND30 (Fig. 3B, red arrowheads). We then  
164 examined the morphology of single neuron by diolistic labeling using DiI, a lipophilic dye that  
165 diffuses through the membrane lipid bilayer and stains the whole cell structure, first in primary

166 neuron culture and then in brain slices. At 14 days *in vitro* (DIV), we observed long,  
167 filamentous and tertiary branch-like structures with larger growth cones on the dendrite of  
168 *Arfgefl*<sup>fs/+</sup> primary hippocampal neurons (Fig. 3C, red arrowheads). These tertiary structures  
169 did not adhere to the culture dish surface compared to the respective primary dendrite. Larger  
170 growth cone size has been shown to correlate with slower neurite growth rate (Ren and Suter,  
171 2016), suggesting a delay in dendritic branch maturation. In *Arfgefl*<sup>fs/+</sup> brain slices, although  
172 the total spine density was similar in deep layer neurons of both genotypes (Fig. 3D, 3E), the  
173 distribution of spine morphological subtypes was altered. In *Arfgefl*<sup>fs/+</sup> dendrites, the fraction  
174 of mushroom-shaped spines was significantly higher than observed in wildtype (Fig. 3D,  
175 bottom inset, red arrowheads), whereas there were fewer thin spines and filopodia (Fig. 3F).  
176 Since mushroom spines on cortical deep layer neurons are typically more persistent than the  
177 immature thin spines or filopodia (Trachtenberg et al., 2002), this evidence suggested changes  
178 in dendritic spine plasticity.

179

### 180 **Seizure susceptibility of *Arfgefl*<sup>fs/+</sup> adult mice**

181 In four years of breeding, *Arfgefl*<sup>fs/+</sup> mice show no signs of spontaneous convulsive seizure  
182 throughout their lifetime, nor was there evidence of seizure or epileptiform activity in 48 hr  
183 video-EEG recordings of heterozygous adult mice (Fig. S3). However, both male and female  
184 heterozygotes have a significantly reduced electroconvulsive threshold to the minimal  
185 forebrain clonic seizure endpoint, compared with wildtype littermates (Wilcoxon test with  
186 permutation  $p=0.003$  and  $p=0.001$ , respectively; Fig. 4A). They are also susceptible to tonic-  
187 clonic seizures induced by subcutaneous GABA<sub>A</sub>R antagonist pentylenetetrazol (PTZ) at a  
188 dose (40 mg/kg) near the threshold for wildtype C57BL/6NJ mice. Thus, 92.7% of *Arfgefl*<sup>fs/+</sup>  
189 heterozygotes reached the tonic-clonic seizure or worse endpoint, in contrast to 18.2% of  
190 wildtype mice ( $p<0.0001$ , Fisher's Exact Test). The average latency to the first tonic-clonic



191 seizure was also significantly shorter in *Arfgef1*<sup>fs/+</sup> mice, by an average of 788 sec (Wilcoxon  
192 test with permutation  $p < 0.001$ ; Fig. 4B).

193

#### 194 **Decreased dendritic surface GABA<sub>A</sub>R in *Arfgef1*<sup>fs/+</sup> neurons**

195 Li and colleagues (2014) previously demonstrated that siRNA-mediated depletion of *Arfgef1*  
196 could reduce functional GABA<sub>A</sub>R at the membrane surface (Li et al., 2014). Given the  
197 morphological features and seizure susceptibility of *Arfgef1*<sup>fs/+</sup> mice, we examined GABA<sub>A</sub>R  
198 localization in primary hippocampal neuron culture. Through immunofluorescence staining of  
199 permeabilized neurons, we determined that the total number of GABA<sub>A</sub>R puncta in proximal  
200 dendrite of *Arfgef1*<sup>fs/+</sup> was similar to that of wildtype (Fig. 5A, D). However, on non-  
201 permeabilized neurons, the dendritic surface bound GABA<sub>A</sub>R puncta count decreased in  
202 *Arfgef1*<sup>fs/+</sup> (Fig. 5B, E). GABA<sub>A</sub>R puncta colocalized with synaptophysin, a synaptic marker,  
203 also decreased (Fig. 5C, F), together suggesting a decrease in synaptic GABA<sub>A</sub>R density along  
204 the dendritic surface. Initial assessment of synaptic properties of hippocampal pyramidal  
205 neurons from these cultures at DIV14 showed that *Arfgef1*<sup>fs/+</sup> neurons had a nominal increase  
206 in mean mEPSC frequency and no difference in mIPSC frequency or in mEPSC or mIPSC  
207 amplitude (Figure S4A, B, C).

208

#### 209 **Disrupted distribution of GABA<sub>A</sub>R-containing trafficking vesicles in *Arfgef1*<sup>fs/+</sup> neurons**

210 Because the total GABA<sub>A</sub>R puncta count remained unchanged, we reasoned that the decrease  
211 in synaptic GABA<sub>A</sub>R may result from malfunction either in receptor trafficking or in recycling  
212 to the plasma membrane. That is, GABA<sub>A</sub>R might be endocytosed but cannot be recycled back  
213 to plasma membrane (Li et al., 2014), or there is slowdown in trafficking of GABA<sub>A</sub>R from  
214 Golgi to plasma membrane.

215

216 There is significant heterogeneity in the type and subcellular localization of recycling  
217 endosomes in neurons, and this heterogeneity is in part represented by Arf6<sup>+</sup>, Rab11<sup>+</sup>, TrfR<sup>+</sup>  
218 markers. For example, Arf6<sup>+</sup> but not Rab11<sup>+</sup> and TrfR<sup>+</sup> recycling endosomes respond to nerve  
219 growth factor (NGF) stimulation, suggesting functional differences in recycling endosome  
220 species (Kobayashi and Fukuda, 2013). By immunofluorescent staining of primary  
221 hippocampal neurons, we determined the density of Arf6<sup>+</sup>, Rab11<sup>+</sup> and Trf<sup>+</sup> recycling  
222 endosomes by software-assisted segmentation (Fig.S5A, B, C) and quantified vesicle-  
223 GABA<sub>A</sub>R colocalization using object-based colocalization (Fig. S7A, B, C, D; see Methods).  
224 We found that the the density of Arf6<sup>+</sup>, Rab11<sup>+</sup> and Trf<sup>+</sup> was each decreased in *Arfgefl*<sup>fs/+</sup>  
225 neuronal cell body (Fig. S6Ai, Bi, Ci), as was the density of these respective vesicles that  
226 colocalized with GABA<sub>A</sub>R (Fig. 6Ai, Bi, Ci, S7A, B, C). These results suggest either an  
227 increase in the dendritic GABA<sub>A</sub>R recycling, leading to reduction in retrograde trafficking into  
228 the cell body, or increase in the recycling endosome that mature into late endosomes. The  
229 former is less likely because our result demonstrated reduction in dendritic surface-bound  
230 GABA<sub>A</sub>R. Findings in dendrites further reinforced this idea: in *Arfgefl*<sup>fs/+</sup> dendrites, Arf6<sup>+</sup>  
231 recycling endosomes decreased in density compared to wildtype (Fig. S5A, S6Aii), including  
232 those that colocalized with GABA<sub>A</sub>R (Fig. 6Aii, S7A). In contrast, the density of Rab11<sup>+</sup> and  
233 TrfR<sup>+</sup> recycling endosomes (Fig. S5B, C, 6Bii, Cii) and those colocalized with GABA<sub>A</sub>R (Fig.  
234 6Bii, Cii, S7B, C) in *Arfgefl*<sup>fs/+</sup> dendrite were comparable to wildtype. These results suggest  
235 that *Arfgefl* haploinsufficiency does not only reduced density of Arf6<sup>+</sup>, Rab11<sup>+</sup>, TrfR<sup>+</sup>  
236 recycling endosomes in cell body, such haploinsufficiency may also specifically affects Arf6-  
237 dependent dendritic GABA<sub>A</sub>R recycling.  
238  
239

240 It is useful to consider the impact of *Arfgef1* genotype on the relative ratio of Arf6<sup>+</sup>, Rab11<sup>+</sup>,  
241 and TrfR<sup>+</sup> recycling endosomes, because of the interrelationship between these microorganelles.  
242 Pairwise comparisons of mutant to wildtype showed that the recycling endosome ratio was  
243 significantly skewed in *Arfgef1*<sup>fs/+</sup> dendrite (p=0.006) but not in cell body (p=0.252). The  
244 imbalance in recycling endosome populations in dendrite could be the reason for the decrease  
245 of dendritic surface GABA<sub>A</sub>R.

246

247 The early endosome is an intermediate organelle, which can either turn into recycling  
248 endosomes or mature into lysosomes (Naslavsky and Caplan, 2018). Earlier evidence showed  
249 that Arfgef1 also localizes on early endosomes and functions similarly as Arfgef1 localized in  
250 the trans-Golgi network (D'Souza et al., 2014). Reduction in the density of early endosomes in  
251 dendrite could be the reason for the change in the density of recycling endosomes. However,  
252 when compared to wildtype, there were no changes in the density of EEA1<sup>+</sup> early endosomes  
253 in dendrite or cell body of *Arfgef1*<sup>fs/+</sup> neurons (Fig. S5D, S6Di, ii), as well as the density of  
254 early endosomes that colocalized with GABA<sub>A</sub>R (Fig.6Di, ii, S7D).

255

### 256 **Accumulation of GABA<sub>A</sub>R in lysosomes in *Arfgef1*<sup>fs/+</sup> neurons**

257 The decrease of surface GABA<sub>A</sub>R accompanied by decrease in recycling endosomes suggest  
258 that the internalized receptors might have been targeted elsewhere. It has been shown that  
259 internalized GABA<sub>A</sub>R that fail to recycle back to the plasma membrane are directed to  
260 lysosomes for degradation (Kittler et al., 2004). This led us to determine whether reduction in  
261 surface GABA<sub>A</sub>R was accompanied by lysosomal accumulation of GABA<sub>A</sub>R. Indeed, in cell  
262 body and dendrite of *Arfgef1*<sup>fs/+</sup> neurons, Lamp1<sup>+</sup> lysosome density (Fig. 6E, Fi,ii), as well as  
263 lysosome that colocalized with GABA<sub>A</sub>R (Fig.6Gi, ii) increased compared to wildtype. This

264 showed that GABA<sub>A</sub>R in *Arfgef1*<sup>fs/+</sup> neurons were redirected to lysosomes instead of being  
265 recycled back plasma membrane.

266

## 267 **Discussion**

268 *Arfgef1*<sup>fs/+</sup> mice were generated to model a Lennox-Gastaut Syndrome patient heterozygous for  
269 a *de novo* mutation that creates a premature translational stop in the *Arfgef1* C-terminus, and  
270 thus a haploinsufficient state via presumed nonsense-mediated decay. *Arfgef1*<sup>fs/+</sup> mice do not  
271 have spontaneous convulsions, as is sometimes the case with genotypically accurate mouse  
272 models of childhood epilepsy that either do not have spontaneous seizures (Frankel et al., 2009;  
273 Amendola et al., 2014) or have seizures of a different type than described in the respective  
274 patients (Warner et al., 2016; Kovacevic et al., 2018). However, *Arfgef1*<sup>fs/+</sup> do have a low  
275 threshold to induced seizures, indicating clear seizure susceptibility. Their abnormal  
276 performance in developmental milestone tasks, modest but significant, also suggests global  
277 developmental delay and possibly hypotonia, like the patient. The predicted maturation rate for  
278 mouse is 150 times faster than human in the first month. Thus, the age at which the *Arfgef1*<sup>fs/+</sup>  
279 developmental features are most apparent, between ages PND5 and PND7, is equivalent to a  
280 2-3 year child (Flurkey et al., 2007). This very rapid postnatal maturation in mouse may also  
281 partly account for compensatory neurodevelopmental features that prevent a more severe  
282 outcome, such as spontaneous seizures.

283

284 *Arfgef1*<sup>fs/+</sup> animals have a normal lifespan, whereas *Arfgef1*<sup>fs/fs</sup> die perinatally; in agreement  
285 with the earlier report of *Arfgef1* knockout mice (Teoh et al., 2017), except the forebrain defect  
286 evident at E17.5 in *Arfgef1*<sup>fs/fs</sup> mice, is more severe. This difference could be due merely to  
287 genetic background: the earlier study did not use an inbred strain but rather a mixed  
288 129/SvJ;C57BL/6J background in which hybrid vigor may have mitigated severity.

289

290 The GABA<sub>A</sub>R is a membrane-bound ligand-gated ion channel selective for chloride ions  
291 (Moroni et al., 2011). Accumulation of GABA<sub>A</sub>R at the synaptic site is required for inhibitory  
292 synapse formation and for fast synaptic inhibition (Bogdanov et al., 2006). Other than being  
293 trafficked from Golgi to plasma membrane (Luscher et al., 2011), surface GABA<sub>A</sub> receptors  
294 also undergo constitutive endocytosis and then are recycled back to the membrane surface or  
295 delivered to lysosome for degradation (Kittler et al., 2000). Our results suggest that both copies  
296 of *Arfgef1* are required to maintain normal endosome composition, which is in turn critical for  
297 receptor recycling.

298

299 Arl1 recruits Arfgef1 to early endosomes (D'Souza et al., 2014). Internalized membrane surface  
300 receptors fed into early endosomes have several fates. Surface receptors stay in early  
301 endosomes if they are not quickly recycled to plasma membrane from early endosomes or  
302 delivered into recycling endosomes for slow recycling. The early endosomes with surface  
303 receptors that are not destined for recycling then mature into lysosomes for degradation  
304 (Kittler et al., 2004; Naslavsky and Caplan, 2018). In *Arfgef1*<sup>fs/+</sup> neurons, there was no change  
305 in dendritic early endosomes density but Arf6<sup>+</sup> recycling endosomes were available albeit  
306 decreased in density, suggesting that less early endosomes are destined for recycling – as  
307 supported by our observation of decreased GABA<sub>A</sub>R on the *Arfgef1*<sup>fs/+</sup> dendrite surface - these  
308 vesicles mature into lysosomes, which, in turn, are more abundant in the *Arfgef1*<sup>fs/+</sup> cell body.

309

310 The imbalance of recycling and early endosome populations may also explain why there are  
311 more lysosomes in *Arfgef1*<sup>fs/+</sup>. AP1 and GGAs, recruited by the Arfgef to the trans-Golgi  
312 network, are required to regulate lysosomal enzyme trafficking from the trans-Golgi to  
313 lysosomes (Le Borgne and Hoflack, 1998; Hirst et al., 2000; Lowery et al., 2013). Depletion

314 of *Arfgef1* alone does not affect the level of GGAs in the trans-Golgi network (Boal and  
315 Stephens, 2010; Miyamoto et al., 2018). It has also been demonstrated that the number of  
316 synaptic GABA<sub>A</sub>Rs increase in GGA-deficient mouse (Walker et al., 2016). However,  
317 depletion of *Arfgef1* reduces the formation of AP-1 complex. Notably, such depletion does not  
318 entirely eliminate AP-1 (Miyamoto et al., 2018). Since *Arfgef2* can compensate for *Arfgef1* in  
319 the trans-Golgi network (Ramaen et al., 2007), AP-1 and GGAs levels are required for  
320 maintaining the network through to lysosomal trafficking, thus the degradation rate would be  
321 be maintained in *Arfgef1*<sup>ts/+</sup> neurons. In our study, although there is significantly less dendritic  
322 surface-bound GABA<sub>A</sub>R, some GABA<sub>A</sub>R can still be transported to the membrane surface.  
323 Thus, the reduction of surface GABA<sub>A</sub>R is most likely due to reduced recycling, leading to  
324 increased GABA<sub>A</sub>R accumulation in lysosomes.

325

326 We can only speculate why *Arfgef1* haploinsufficiency in mouse is less severe than the human  
327 disease it models, or why more *ARFGEF1* variants have not been found in epilepsy. Lennox-  
328 Gastaut Syndrome is a genetically heterogeneous complex childhood epilepsy, if a primary  
329 gene is known at all. *Arfgef1* homozygous knockouts are very severely impaired. One  
330 possibility is that a very delicate balance of gene dosage, combined with a limited window of  
331 late gestational or early postnatal vulnerability, allows the more rapid mouse postnatal  
332 development to push through. A more discrete possibility is that *ARFGEF1* is actually a  
333 modifier mutation, requiring another predisposing variant for severe disease. In multiple prior  
334 studies, *ARFGEF1* was reported as a candidate together with at least one other gene. For  
335 example, in a large Australian family spanning three generations in which *CRH* had been  
336 proposed as a EE candidate gene (Wallace et al., 1996), Piro and colleagues later suggested  
337 that *ARFGEF1* was also plausible (Piro et al., 2011). In another study of copy number variants  
338 (CNV), the authors reported an EE patient with onset of 10 years with *ARFGEF1* and *CSPP1*

339 as candidate genes (Addis et al., 2018). In our study, the Lennox-Gastaut patient also carried a  
340 nonsynonymous *BMP2* variant; while *BMP2* is not yet associated with epilepsy at least one  
341 study has shown that *BMP2* signaling promotes the differentiation of some GABAergic  
342 neurons (Yao et al., 2010). Regardless, the specific impact of *Arfgef1* haploinsufficiency on  
343 endosomal balance and dendritic vesicle fate is an attractive pathogenic mechanism and  
344 therapeutic target opportunity that may apply to other forms of childhood epilepsy.

345

## 346 **Materials and Methods**

### 347 **Generation of *Arfgef1* mice**

348 All mice breeding and husbandry were done within the Institute of Comparative Medicine in  
349 Columbia University. The mice were kept under a 12-hr day-night cycle with unlimited access  
350 to water and food. Mice at two to six-months-old were used for mating. All animal-related  
351 procedures were performed according to the guidelines of the Institutional Animal Care and  
352 Use Committee (IACUC) of Columbia University. The germline mutation mice were generated  
353 in the Genetic Engineering and Technology Core at The Jackson Laboratory (Bar Harbor, ME).  
354 In mouse, the *Arfgef1* gene is on Chromosome 1 and consists of 38 exons. Briefly, a guide  
355 RNA directing Cas9 endonuclease together with a single-stranded repair template targeting  
356 exon 30 was injected into single-cell mouse embryos of C57BL/6NJ line. Founder line were  
357 genotyped using PCR (primer F3, 5'-GTCTGAAGTGAAGCACGTTGG-3' and primer R3,  
358 5'-CAGTGGGGTCAACGTGTTATG-3'), restriction enzyme digestion (MwoI; New England  
359 Biolabs, R0573L) and DNA sequencing (primer F2, 5'-GTGGCTAGAGAGGCTCGTTTT-3').  
360 Identified founder mice were crossed with wildtype C57BL/6NJ, resulting *Arfgef1*<sup>fs</sup> line (4-nt  
361 deletion in exon 30).

362

### 363 **RT-PCR**

364 Total RNA was collected from wildtype and *Arfgef1*<sup>fs/+</sup> brains at embryonic day 17.5 (E17.5)  
365 using TRIzol reagent (Ambion, 15596026). Reverse transcription was performed using  
366 SuperScript™ III First-Strand Synthesis SuperMix for qRT-PCR (Invitrogen, 11752-050)  
367 according to the manufacturer's protocol. PCR was then performed using primers flanking  
368 *Arfgef1* cDNA corresponding to the exons 3-6 (N-terminal DCB domain), exons 13-17 (Sec7  
369 domain), exons 29-31 (mutation site) and exons 31-38 (C-terminal HSD4 domain) with  
370 primers flanking actin as control. The PCR products were subjected to electrophoresis on 2%  
371 agarose gels. The primers used in this experiment were listed below.

372

373 DCB domain

374 Forward: 5'- CAC CCT TCC ACC AGT GAA ATC A -3'

375 Reverse: 5'- TGC TGC CGA TGT CTT TCT CTT TC -3'

376 Amplicon size: 495bp

377

378 Sec7 domain

379 Forward: 5'- GGA ATT GGC AGC TAC AGT ACA CAG -3'

380 Reverse: 5'- CCT GTG GAC TGT GAA GGT CTG -3'

381 Amplicon size: 505bp

382

383 Exon 29-31

384 Forward: 5'- GAC AAC ATG AAA TTG CCA GAA CAG C -3'

385 Reverse: 5'- GAT ATC CAG GGT GCA GTT ACA CG -3'

386 Amplicon size: 285bp

387

388 HSD4 domain



389 Forward: 5'- GCT GGA ACT CAT CCA GAC CAT C -3'

390 Reverse: 5'- TGA GCT TTA AAC CTG CTG TCA CTG -3'

391 Amplicon size: 524bp

392

393 Actin

394 Forward: 5'- ACG ATA TCG CTG CGC TGG -3'

395 Reverse: 5'- GAG CAT CGT CGC CCG C -3'

396 Amplicon size: 72bp

397

### 398 **Antibodies**

399 The following primary antibodies were used: Anti-Arfgef1 N-terminal epitope (ThermoFisher  
400 Scientific, PA5-54894; Santa Cruz, sc-376790; sc-50391), anti-Arfgef1 C-terminal epitope  
401 (Bethyl, A300-998A), Anti-GABA A Receptor with epitope for extracellular domain of the  
402  $\beta$ 2,3 subunits (Millipore Sigma, MAB341), anti-synaptophysin (ThermoFisher Scientific,  
403 PA1-1043), anti-lamp1 (DSHB, 1D4B), anti-eea1 (R&D Systems, AF8047), anti-transferrin  
404 receptor (Abcam, ab84036), anti-Rab11 (ThermoFisher Scientific, 71-5300), anti-Arf6  
405 (ThermoFisher Scientific, PA1-093), anti-map2 (Millipore Sigma, Ab5622), anti-ankG (Santa  
406 Cruz, sc-28561), anti- $\beta$ -tubulin (Proteintech, 10094-1-AP and 66240-1-Ig), anti-GAPDH  
407 (Proteintech, 60004-1-Ig), anti-lamin B1 (Proteintech, 66095-1-Ig). The following secondary  
408 antibodies were used: Goat anti-mouse HRP-conjugated IgG (Proteintech, SA00001-1), goat  
409 anti-rabbit HRP-conjugated IgG (Proteintech, SA00001-2), Goat anti-mouse Alexa Fluor 488-  
410 conjugated IgG (ThermoFisher Scientific, A11017), goat anti-rabbit Alexa Fluor 594-  
411 conjugated IgG (ThermoFisher Scientific, A11072), goat anti-rat Alexa Fluor 594-conjugated  
412 IgG (ThermoFisher Scientific, A11007), donkey anti-sheep NL557-conjugated IgG (R&D  
413 Systems, NL010).

414

## 415 **Western blotting**

416 Brain lysates were collected using the trichloroacetic acid precipitation method. Briefly, the  
417 lysates were separated by SDS-PAGE and transferred to Immobilon-PSQ PVDF Membrane  
418 (Millipore Sigma, ISEQ00010). The membranes were incubated with primary antibodies  
419 overnight at 4°C, followed by incubation with the appropriate HRP-conjugated secondary  
420 antibody for 1 hr at room temperature. Samples were washed three times in PBS with 0.05%  
421 Tween-20 (PBST) after each step. Signals were developed using Amersham ECL Western  
422 Blotting Detection Reagent (GE Healthcare, RPN2106) and visualized using western blot  
423 imaging system (Azure Biosystems, Azure C400).

424

## 425 **Video-EEG**

426 Mice of both sexes, aged 5 weeks and 8 weeks were anesthetized through intraperitoneal  
427 injection of 400mg/kg 2,2,2-Tribromoethanol (Sigma Aldrich, T48402). Surgery was  
428 performed to drill four burr holes. The first two holes located 1 mm anterior to bregma on both  
429 sides. The third hole located 2 mm posterior to bregma on the left side. The fourth hole located  
430 over the cerebellum as reference. Four teflon-coated silver wires soldered on a microconnector  
431 (Mouser electronics, 575-501101) were placed between dura mater and pia mater and a dental  
432 cap was applied. Post-operative mice were given 5mg/kg carprofen (Zoetis, Rimadyl injectable)  
433 subcutaneously and a recovery time of 48 hours before electroencephalography (EEG)  
434 recording. The recovered mice were then connected to Natus Quantum programmable  
435 amplifier (Natus Neurology, 014160) for 24 hours over one day-night cycle. The mice activity  
436 was video-recorded simultaneously using a night-vision-enabled Sony IPELA EP500 camera.  
437 Differential amplification recordings were recorded pair-wise between the three electrodes and

438 a referential electrode, resulted in a montage of 6 channels for each mouse. The EEG data was  
439 analyzed using Natus Database v8.5.1.

440

#### 441 **Seizure susceptibility tests**

442 Electroconvulsive threshold testing was performed in mice 7-10 weeks of age as described  
443 previously with minor modification(Frankel et al., 2001)s (Frankel et al., 2001). Briefly, a drop  
444 of a topical anesthetic (0.5% tetracaine in 0.9% NaCl) was placed on each eye of a restrained  
445 mouse, and current was applied using silver transcorneal electrodes connected to an  
446 electroconvulsive stimulator (Ugo Basile model 7801) using the following parameters: 299 Hz  
447 frequency 1.6 ms pulse width, 0.2 s pulse duration, variable current. Mice were tested  
448 approximately daily in 0.5 mA increments until the minimal clonic forebrain seizure endpoint  
449 was reached. For analysis the mean integrated root mean square (iRMS) current is reported for  
450 each genotype-sex group.

451 Chemical seizure susceptibility was performed using subcutaneous injection of mice between  
452 9 and 10 weeks of age using pentylenetetrazol (PTZ), a GABAA receptor antagonist. Mice  
453 were observed for 30 min and incidence of and latency to the first tonic-clonic seizure endpoint  
454 was recorded. The PTZ dose of 40 mg/kg was predetermined to be near the threshold for the  
455 tonic-clonic seizure endpoint in C57BL/6NJ mice of this age.

456 The Wilcoxon non-parametric rank-sum test with 1000 permutations was used in R to  
457 determine permutation *p*-values for electroconvulsive threshold and for latency to PTZ-induced  
458 tonic-clonic seizure.

459

## 460 **Developmental milestones and ultrasonic vocalization**

461 All pups from the same litter were kept with respective mother throughout the experimental  
462 period. They were numbered with tattoo on the soles at PND2 and evaluated for neurological  
463 reflexes on PND 3, 5, 7, 9 and 11. Each subject was tested at the same three-hour time window  
464 of a day. The pups were weighted each day during the test. For righting reflex test, the pup was  
465 placed on its back on a flat and hard surface. The time a pup took to right itself on all four paws  
466 was recorded. For negative geotaxis test, the pup was placed with head facing downward on a  
467 20 x 20 cm flat wire mesh screen slanted at 45° angle. The time a pup took to turn around and  
468 face the angle of 90° and 180° from the starting downward direction was recorded. For vertical  
469 screen grasping test, the pups were placed on a 20 x 20 cm flat wire mesh standing vertically  
470 at an angle of 90° to a flat surface. The time a pup was able to maintain itself on the mesh wire  
471 was recorded. All the times were recorded using a stopwatch for a maximum of 30 seconds (s).  
472 All test were carried out under room temperature. The pups were returned to the mother  
473 immediately after the tests.

474 Ultrasonic vocalization from a pup being isolated from its mother and littermates was recorded  
475 on PND 4, 6, 8 and 10. Briefly, a random pup was removed gently from its nest into an isolation  
476 container filled with clean bedding. The container was then placed into a sound attenuating  
477 chamber equipped with an UltraSoundGate Condenser Microphone CM 16 (Avisoft  
478 Bioacoustics, 40011). The microphone connected to an UltraSoundGate 116 USB audio device  
479 (Avisoft Bioacoustics) was linked to a computer installed with Avisoft RECORDER v2.97,  
480 where the acoustic data was recorded at a sampling rate of 250,000 Hz in 16 bit format. The  
481 software was programmed to filtered away acoustic frequency lower than 15 kHz to reduce  
482 background noise interference. Each pup was recorded for 3 min, weighted, and then returned  
483 to nest with mother immediately. The number of calls emitted by the pups was counted by an

484 independent operator blinded from the genotypes. The Wilcoxon non-parametric rank-sum test  
485 with 1000 permutations was used in R to determine permutation  $p$ -values.

486

#### 487 **Hematoxylin and eosin staining**

488 Mice of respective ages were perfused. The brains were carefully extracted and cut along the  
489 lambda-bregma points. Pieces of brains were fixed in 4% (w/v) paraformaldehyde (PFA) in 0.1  
490 M phosphate buffer (PB) at pH 7.4 overnight at 4°C. After serial dehydration steps, the brains  
491 were embedded in paraffin (Sigma, P3808). The brains were sectioned at 5  $\mu$ m thickness using  
492 Leica RM2125 microtome. Every tenth section were collected on a glass slide (Matsunami  
493 Glass, SUMGP14) and subjected to HE staining. Briefly, the slices were rehydrated and stained  
494 with hematoxylin then counterstained with eosin. These slices were subsequently dehydrated  
495 using ethanol and xylene and mounted with coverslip using Permount (Fisher Chemical, SP15-  
496 500). Histological images were acquired using a Nikon Eclipse E800M light microscope and  
497 NIS-elements v4.51. Images were merged using automated function in Photoshop CC 2015.

498

#### 499 ***Ex vivo* single neuron diolistic labeling and spine analysis**

500 The postnatal day (PND) 14 brains were collected and fixed as described above. These brains  
501 were transferred into fresh 2% PFA in 0.1 M PB at pH 7.4 and stored at 4°C for up to two  
502 months before use. The brains were embedded in 4% agarose and shot with a gene gun (Biorad,  
503 1652451) loaded with homemade bullets consisting tungsten microbeads (Biorad, 1652267)  
504 coated with DiI (Invitrogen, D282) at 80 PSI. After gentle washing, the brains were immersed  
505 in fresh 2% PFA in 0.1 M PB at pH 7.4 and stored in a dark moisten chamber for 3 days at  
506 room temperature to allow dye diffusion. Finally, the brains were sliced at 300 $\mu$ m using a  
507 vibrotome (Leica, VT1200) and mounted with coverslip using glycerol. Z-stacks images were

508 acquired immediately using Zeiss LSM-800 confocal microscope and Zen v2.3. The  
509 quantification and morphological analysis of spines were done using NeuronStudio v0.9.92. In  
510 agreement with literature, the spine shapes were categorized as filopodia, thin, mushroom and  
511 stubby (Qiao et al., 2016). Spines with a neck are classified as thin or mushroom based on the  
512 head diameter. Spines longer than 3  $\mu\text{m}$  were classified as filopodia. Spines without a neck are  
513 classified as stubby.

514

### 515 **Primary hippocampal neuron culture**

516 Primary hippocampal neurons were collected according to Fath's method with little  
517 modification (Fath et al., 2009). Briefly, hippocampi were dissected from embryonic day (E)  
518 17.5 embryos, dissociated through trituration with the aid of papain (Worthington, LK003178)  
519 pre-incubation. A total of  $1 \times 10^5$  cells was plated in 35 mm culture dish containing acid-treated  
520 coverslips coated with poly-D-lysine (Sigma-Aldrich, P7886) and laminin (Gibco, 23017015).  
521 The primary hippocampal neurons were kept in culture medium containing Neurobasal-A  
522 medium (Gibco, 10888022) supplemented with B27 (Gibco, 17504044) and Glutamax (Gibco,  
523 35050061). Cytosine  $\beta$ -D-arabinofuranoside (Sigma-Aldrich, C1768) was added once to a final  
524 concentration of 3  $\mu\text{M}$  on the next day after 50% medium change. The cultures were maintained  
525 at 37°C with 5% CO<sub>2</sub> in a humidified incubator. Every three days, 50% expended medium were  
526 replaced with fresh culture medium.

527

### 528 **Immunofluorescence**

529 DIV14 neurons were fixed for 10 min at 4°C with 4% (w/v) PFA in 0.1 M PB at pH 7.4. The  
530 fixed neurons were incubated in blocking buffer containing 5% goat serum (Gibco, 16210064)  
531 and 0.1% saponin (Sigma-Aldrich, 47036) in PBS pH 7.4 (Gibco, 10010031) at room  
532 temperature for 30 min. Blocked neurons were subsequently incubated with primary antibodies

533 in blocking buffer at 4°C overnight followed by incubation with appropriate secondary  
534 antibodies and DAPI in blocking buffer at room temperature for 2 hrs. Samples were washed  
535 three times in PBS after each step. The stained neurons on coverslips were mounted on glass  
536 slides using Fluoromount-G (Southern Biotech, 0100-01) and sealed with nail polish after  
537 drying at room temperature overnight. Z-stacks images were acquired using Zeiss LSM-800  
538 confocal microscope and Zen v2.3. The quantification and analysis of labeled vesicle and  
539 GABA<sub>A</sub>R puncta were done using Imaris v9.2.1 software. Due to the limitation of the point  
540 spread function (PSF) for tiny objects in confocal microscopy, colocalization is quantified  
541 using an object-based method (Dunn et al., 2011). Briefly, vesicle and GABA<sub>A</sub>R puncta stained  
542 with antibodies in cell body or dendrite are recognized and segmented in different channels  
543 using Imaris v9.2.1. One GABA<sub>A</sub>R colocalized with one vesicle is defined as one GABA<sub>A</sub>R  
544 punctum localizes within 1 μm proximity of one vesicle punctum, center to center. There were  
545 no significant differences found in the dendrite length and the cell body area where the data  
546 were collected. Therefore, the number of puncta in dendrite was normalized using dendrite  
547 length (μm) and the number of puncta in cell body was normalized using cell body area (μm<sup>2</sup>).  
548 The normalized numbers were presented as density (in dendrite, vesicle number per μm; in cell  
549 body, vesicle number per μm<sup>2</sup>).

550

551 For statistical analysis of puncta counts, a log-Poisson mixed model was run using the lme4  
552 package in R ([www.R-project.org](http://www.R-project.org)), with cell body area or dendrite length as a respective  
553 covariate and a random effects term included to correct for significant overdispersion in the  
554 count data. To determine whether endosome ratios differed between mutant genotype and  
555 wildtype, genotype x vesicle type interaction terms were included in a similar model which  
556 also included a fixed term for the individual biological from which ratios examined. Statistical  
557 comparisons in this study were considered significant if the p-value is less than 0.05.

558

## 559 **Single cell patch-clamp recordings**

560 To assess synaptic activity, electrophysiological recordings were carried out from dissociated  
561 hippocampal neurons plated at a density of 50000 cells on 15 mm diameter glass coverslips  
562 and cultured for 13-15 days. Recordings were made in voltage clamp whole-cell configuration  
563 using a Multiclamp 700B amplifier and a Digidata 1550 digital-to-analogue converter (both  
564 from Molecular Devices) at a 10 kHz sample frequency. Patch pipettes were fabricated with a  
565 P-97 pipette puller (Sutter Instruments) using 1.5 mm outer diameter, 1.28 mm inner diameter  
566 filamented capillary glass (World Precision Instruments). The external recording solution  
567 contained (in mM): NaCl 145, KCl 5, HEPES 10, Glucose 10, CaCl<sub>2</sub> 2, MgCl<sub>2</sub> 2, 0.001  
568 tetrodotoxin, pH 7.3 with NaOH, and osmolality adjusted to 325 mOsm using sucrose. A  
569 cesium-based pipette solution contained (in mM): cesium methanesulfonate 130, sodium  
570 methanesulfonate 10, EGTA 10, CaCl<sub>2</sub> 1, HEPES 10, TEA-Cl 10, MgATP 5, Na<sub>2</sub>GTP 0.5,  
571 QX-314 5, pH 7.2 with CsOH, adjusted to 290 mOsm with sucrose. Pipettes had final resistance  
572 of approximately 5 MΩ when filled with internal solution. Uncompensated series resistance  
573 was <15 MΩ. Series resistance and membrane capacitance were electrically compensated to  
574 approximately 70%. Miniature excitatory postsynaptic currents (mEPSCs) and miniature  
575 inhibitory postsynaptic currents (mIPSCs), were recorded from the same cell by holding the  
576 cells at -60 and 0 mV, respectively. Recordings were acquired for a period of 5 minutes. All  
577 recordings were carried out at room temperature (21 – 23 °C). Miniature events were detected  
578 offline with Clampfit 12.7 (Molecular Devices) using the template matching function and a  
579 minimum threshold of 5 pA. Each event was manually inspected to determine inclusion or  
580 rejection in analysis. Further analysis was carried out using R ([www.R-project.org](http://www.R-project.org)).

581

## 582 **References**



- 583 Addis L, Sproviero W, Thomas SV, Caraballo RH, Newhouse SJ, Gomez K, Hughes E, Kinalli  
584 M, McCormick D, Hannan S, Cossu S, Taylor J, Akman CI, Wolf SM, Mandelbaum  
585 DE, Gupta R, van der Spek RA, Pruna D, Pal DK (2018) Identification of new risk  
586 factors for rolandic epilepsy: CNV at Xp22.31 and alterations at cholinergic synapses.  
587 *J Med Genet* 55:607-616.
- 588 Amendola E, Zhan Y, Mattucci C, Castroflorio E, Calcagno E, Fuchs C, Lonetti G, Silingardi  
589 D, Vyssotski AL, Farley D, Ciani E, Pizzorusso T, Giustetto M, Gross CT (2014)  
590 Mapping pathological phenotypes in a mouse model of CDKL5 disorder. *PLoS One*  
591 9:e91613.
- 592 Boal F, Stephens DJ (2010) Specific functions of BIG1 and BIG2 in endomembrane  
593 organization. *PLoS One* 5:e9898.
- 594 Bogdanov Y, Michels G, Armstrong-Gold C, Haydon PG, Lindstrom J, Pangalos M, Moss SJ  
595 (2006) Synaptic GABAA receptors are directly recruited from their extrasynaptic  
596 counterparts. *EMBO J* 25:4381-4389.
- 597 D'Souza RS, Semus R, Billings EA, Meyer CB, Conger K, Casanova JE (2014) Rab4  
598 orchestrates a small GTPase cascade for recruitment of adaptor proteins to early  
599 endosomes. *Curr Biol* 24:1187-1198.
- 600 Dunn KW, Kamocka MM, McDonald JH (2011) A practical guide to evaluating colocalization  
601 in biological microscopy. *Am J Physiol Cell Physiol* 300:C723-742.
- 602 Epi4K Consortium et al. (2013) De novo mutations in epileptic encephalopathies. *Nature*  
603 501:217-221.
- 604 Fath T, Ke YD, Gunning P, Gotz J, Ittner LM (2009) Primary support cultures of hippocampal  
605 and substantia nigra neurons. *Nat Protoc* 4:78-85.
- 606 Ferhat AT, Torquet N, Le Sourd AM, de Chaumont F, Olivo-Marin JC, Faure P, Bourgeron T,  
607 Ey E (2016) Recording Mouse Ultrasonic Vocalizations to Evaluate Social  
608 Communication. *J Vis Exp*.
- 609 Flurkey K, Curren JM, Harrison DE (2007) The Mouse in Aging Research.
- 610 Frankel WN, Taylor L, Beyer B, Tempel BL, White HS (2001) Electroconvulsive thresholds  
611 of inbred mouse strains. *Genomics* 74:306-312.
- 612 Frankel WN, Yang Y, Mahaffey CL, Beyer BJ, O'Brien TP (2009) Szt2, a novel gene for  
613 seizure threshold in mice. *Genes Brain Behav* 8:568-576.
- 614 Galindo A, Soler N, McLaughlin SH, Yu M, Williams RL, Munro S (2016) Structural Insights  
615 into Arl1-Mediated Targeting of the Arf-GEF BIG1 to the trans-Golgi. *Cell Rep*  
616 16:839-850.
- 617 Hill JM, Lim MA, Stone MM (2008) Developmental Milestones in the Newborn Mouse. In:  
618 *Neuropeptide Techniques* (I. G, ed), pp 131-149: Humana Press.
- 619 Hirst J, Lui WW, Bright NA, Totty N, Seaman MN, Robinson MS (2000) A family of proteins  
620 with gamma-adaptin and VHS domains that facilitate trafficking between the trans-  
621 Golgi network and the vacuole/lysosome. *J Cell Biol* 149:67-80.
- 622 Jain P, Sharma S, Tripathi M (2013) Diagnosis and management of epileptic encephalopathies  
623 in children. *Epilepsy Res Treat* 2013:501981.
- 624 Kittler JT, Delmas P, Jovanovic JN, Brown DA, Smart TG, Moss SJ (2000) Constitutive  
625 endocytosis of GABAA receptors by an association with the adaptin AP2 complex  
626 modulates inhibitory synaptic currents in hippocampal neurons. *J Neurosci* 20:7972-  
627 7977.
- 628 Kittler JT, Thomas P, Tretter V, Bogdanov YD, Haucke V, Smart TG, Moss SJ (2004)  
629 Huntingtin-associated protein 1 regulates inhibitory synaptic transmission by  
630 modulating gamma-aminobutyric acid type A receptor membrane trafficking. *Proc Natl*  
631 *Acad Sci U S A* 101:12736-12741.

- 632 Kobayashi H, Fukuda M (2013) Arf6, Rab11 and transferrin receptor define distinct  
633 populations of recycling endosomes. *Commun Integr Biol* 6:e25036.
- 634 Kovacevic J, Maroteaux G, Schut D, Loos M, Dubey M, Pitsch J, Rummelink E, Koopmans B,  
635 Crowley J, Cornelisse LN, Sullivan PF, Schoch S, Toonen RF, Stiedl O, Verhage M  
636 (2018) Protein instability, haploinsufficiency, and cortical hyper-excitability underlie  
637 STXBP1 encephalopathy. *Brain* 141:1350-1374.
- 638 Le Borgne R, Hoflack B (1998) Mechanisms of protein sorting and coat assembly: insights  
639 from the clathrin-coated vesicle pathway. *Curr Opin Cell Biol* 10:499-503.
- 640 Le K, Li CC, Ye G, Moss J, Vaughan M (2013) Arf guanine nucleotide-exchange factors BIG1  
641 and BIG2 regulate nonmuscle myosin IIA activity by anchoring myosin phosphatase  
642 complex. *Proc Natl Acad Sci U S A* 110:E3162-3170.
- 643 Li C, Chen S, Yu Y, Zhou C, Wang Y, Le K, Li D, Shao W, Lu L, You Y, Peng J, Huang H,  
644 Liu P, Shen X (2014) BIG1, a brefeldin A-inhibited guanine nucleotide-exchange factor,  
645 is required for GABA-gated Cl<sup>-</sup> influx through regulation of GABAA receptor  
646 trafficking. *Mol Neurobiol* 49:808-819.
- 647 Lin S, Zhou C, Neufeld E, Wang YH, Xu SW, Lu L, Wang Y, Liu ZP, Li D, Li C, Chen S, Le  
648 K, Huang H, Liu P, Moss J, Vaughan M, Shen X (2013) BIG1, a brefeldin A-inhibited  
649 guanine nucleotide-exchange protein modulates ATP-binding cassette transporter A-1  
650 trafficking and function. *Arterioscler Thromb Vasc Biol* 33:e31-38.
- 651 Lowery J, Szul T, Styers M, Holloway Z, Oorschot V, Klumperman J, Sztul E (2013) The Sec7  
652 guanine nucleotide exchange factor GBF1 regulates membrane recruitment of BIG1  
653 and BIG2 guanine nucleotide exchange factors to the trans-Golgi network (TGN). *J*  
654 *Biol Chem* 288:11532-11545.
- 655 Luscher B, Fuchs T, Kilpatrick CL (2011) GABAA receptor trafficking-mediated plasticity of  
656 inhibitory synapses. *Neuron* 70:385-409.
- 657 Manolea F, Claude A, Chun J, Rosas J, Melancon P (2008) Distinct functions for Arf guanine  
658 nucleotide exchange factors at the Golgi complex: GBF1 and BIGs are required for  
659 assembly and maintenance of the Golgi stack and trans-Golgi network, respectively.  
660 *Mol Biol Cell* 19:523-535.
- 661 Miyamoto Y, Torii T, Tago K, Tanoue A, Takashima S, Yamauchi J (2018) BIG1/Arfgef1 and  
662 Arf1 regulate the initiation of myelination by Schwann cells in mice. *Sci Adv*  
663 4:eaar4471.
- 664 Moroni M, Biro I, Giugliano M, Vijayan R, Biggin PC, Beato M, Sivilotti LG (2011) Chloride  
665 ions in the pore of glycine and GABA channels shape the time course and voltage  
666 dependence of agonist currents. *J Neurosci* 31:14095-14106.
- 667 Nakai W, Kondo Y, Saitoh A, Naito T, Nakayama K, Shin HW (2013) ARF1 and ARF4  
668 regulate recycling endosomal morphology and retrograde transport from endosomes to  
669 the Golgi apparatus. *Mol Biol Cell* 24:2570-2581.
- 670 Naslavsky N, Caplan S (2018) The enigmatic endosome - sorting the ins and outs of endocytic  
671 trafficking. *J Cell Sci* 131.
- 672 Piro RM, Molineris I, Ala U, Di Cunto F (2011) Evaluation of candidate genes from orphan  
673 FEB and GEFS+ loci by analysis of human brain gene expression atlases. *PLoS One*  
674 6:e23149.
- 675 Qiao H, Li MX, Xu C, Chen HB, An SC, Ma XM (2016) Dendritic Spines in Depression: What  
676 We Learned from Animal Models. *Neural Plast* 2016:8056370.
- 677 Ramaen O, Joubert A, Simister P, Belgareh-Touze N, Olivares-Sanchez MC, Zeeh JC,  
678 Chantalat S, Golinelli-Cohen MP, Jackson CL, Biou V, Cherfils J (2007) Interactions  
679 between conserved domains within homodimers in the BIG1, BIG2, and GBF1 Arf  
680 guanine nucleotide exchange factors. *J Biol Chem* 282:28834-28842.

- 681 Ren Y, Suter DM (2016) Increase in Growth Cone Size Correlates with Decrease in Neurite  
682 Growth Rate. *Neural Plast* 2016:3497901.
- 683 Saeki N, Tokuo H, Ikebe M (2005) BIG1 is a binding partner of myosin IXb and regulates its  
684 Rho-GTPase activating protein activity. *J Biol Chem* 280:10128-10134.
- 685 Shen X, Xu KF, Fan Q, Pacheco-Rodriguez G, Moss J, Vaughan M (2006) Association of  
686 brefeldin A-inhibited guanine nucleotide-exchange protein 2 (BIG2) with recycling  
687 endosomes during transferrin uptake. *Proc Natl Acad Sci U S A* 103:2635-2640.
- 688 Shen X, Meza-Carmen V, Puxeddu E, Wang G, Moss J, Vaughan M (2008) Interaction of  
689 brefeldin A-inhibited guanine nucleotide-exchange protein (BIG) 1 and kinesin motor  
690 protein KIF21A. *Proc Natl Acad Sci U S A* 105:18788-18793.
- 691 Teoh JJ, Iwano T, Kunii M, Atik N, Avriyanti E, Yoshimura SI, Moriwaki K, Harada A (2017)  
692 BIG1 is required for the survival of deep layer neurons, neuronal polarity, and the  
693 formation of axonal tracts between the thalamus and neocortex in developing brain.  
694 *PLoS One* 12:e0175888.
- 695 Trachtenberg JT, Chen BE, Knott GW, Feng G, Sanes JR, Welker E, Svoboda K (2002) Long-  
696 term in vivo imaging of experience-dependent synaptic plasticity in adult cortex. *Nature*  
697 420:788-794.
- 698 Walker KR, Modgil A, Albrecht D, Lomoio S, Haydon PG, Moss SJ, Tesco G (2016) Genetic  
699 Deletion of the Clathrin Adaptor GGA3 Reduces Anxiety and Alters GABAergic  
700 Transmission. *PLoS One* 11:e0155799.
- 701 Wallace RH, Berkovic SF, Howell RA, Sutherland GR, Mulley JC (1996) Suggestion of a  
702 major gene for familial febrile convulsions mapping to 8q13-21. *J Med Genet* 33:308-  
703 312.
- 704 Warner TA, Shen W, Huang X, Liu Z, Macdonald RL, Kang JQ (2016) Differential molecular  
705 and behavioural alterations in mouse models of GABRG2 haploinsufficiency versus  
706 dominant negative mutations associated with human epilepsy. *Hum Mol Genet*  
707 25:3192-3207.
- 708 Wright J, Kahn RA, Sztul E (2014) Regulating the large Sec7 ARF guanine nucleotide  
709 exchange factors: the when, where and how of activation. *Cell Mol Life Sci* 71:3419-  
710 3438.
- 711 Yamaji R, Adamik R, Takeda K, Togawa A, Pacheco-Rodriguez G, Ferrans VJ, Moss J,  
712 Vaughan M (2000) Identification and localization of two brefeldin A-inhibited guanine  
713 nucleotide-exchange proteins for ADP-ribosylation factors in a macromolecular  
714 complex. *Proc Natl Acad Sci U S A* 97:2567-2572.
- 715 Yao M, Niu G, Sheng Z, Wang Z, Fei J (2010) Identification of a Smad4/YY1-recognized and  
716 BMP2-responsive transcriptional regulatory module in the promoter of mouse GABA  
717 transporter subtype I (Gat1) gene. *J Neurosci* 30:4062-4071.
- 718 Zhao X, Lasell TK, Melancon P (2002) Localization of large ADP-ribosylation factor-guanine  
719 nucleotide exchange factors to different Golgi compartments: evidence for distinct  
720 functions in protein traffic. *Mol Biol Cell* 13:119-133.
- 721 Zhou C, Li C, Li D, Wang Y, Shao W, You Y, Peng J, Zhang X, Lu L, Shen X (2013) BIG1,  
722 a brefeldin A-inhibited guanine nucleotide-exchange protein regulates neurite  
723 development via PI3K-AKT and ERK signaling pathways. *Neuroscience* 254:361-368.  
724
- 725

# Figure 1

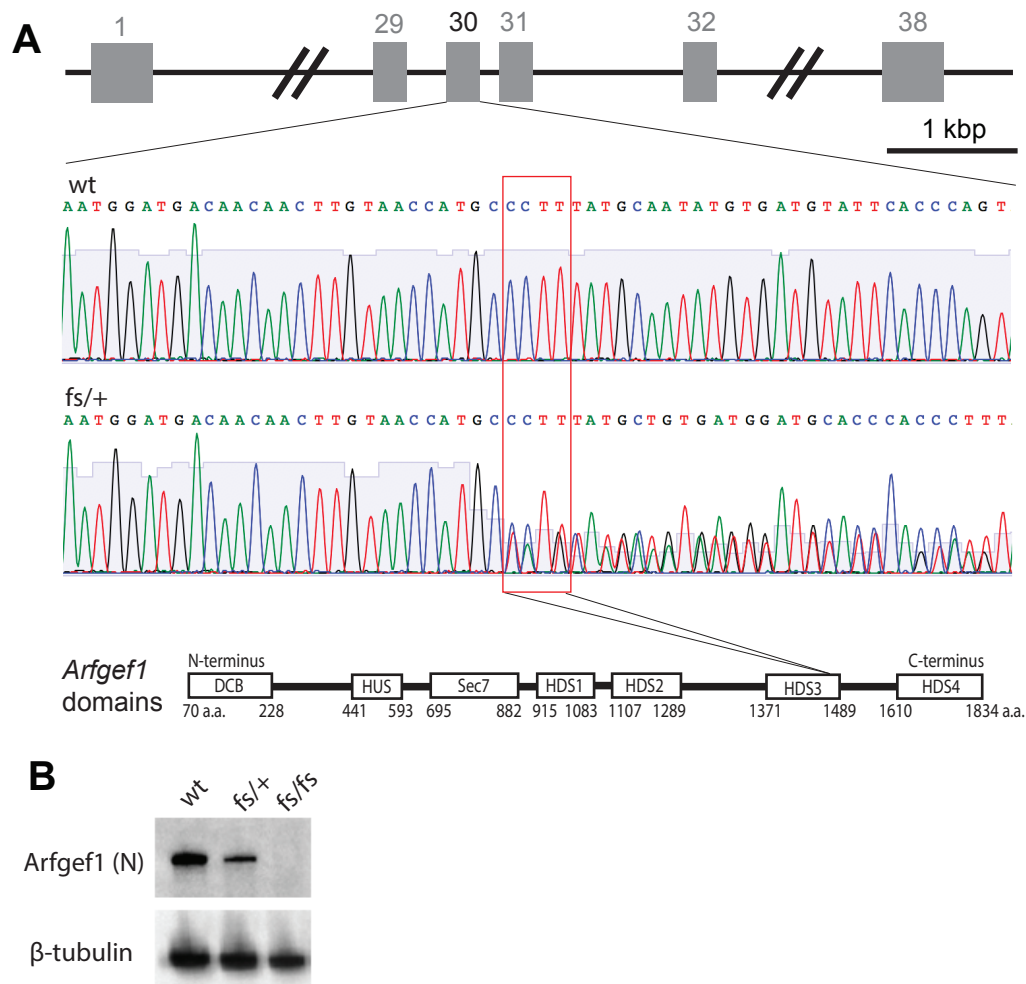

**Figure 1. Generation and genotyping of *Arfgef1*<sup>fs</sup> mice.** **A**, The CRISPR/Cas9 targeting *Arfgef1* exon 30 on mouse Chromosome 1 resulted in a 4-nt frameshift mutation (*Arfgef1*<sup>fs</sup>). The heterozygotes (*Arfgef1*<sup>fs/+</sup>) were verified with Sanger sequencing. The red box shows the sites of mutation for *Arfgef1*<sup>fs</sup> correspond to HDS3 domain in *Arfgef1* protein. **B**, The western blot was performed using E17.5 brain lysate (n=3 animals per genotype) and detected using antibody targeting *Arfgef1* based on an N-terminal epitope, using  $\beta$ -tubulin as loading control.

## Figure 2

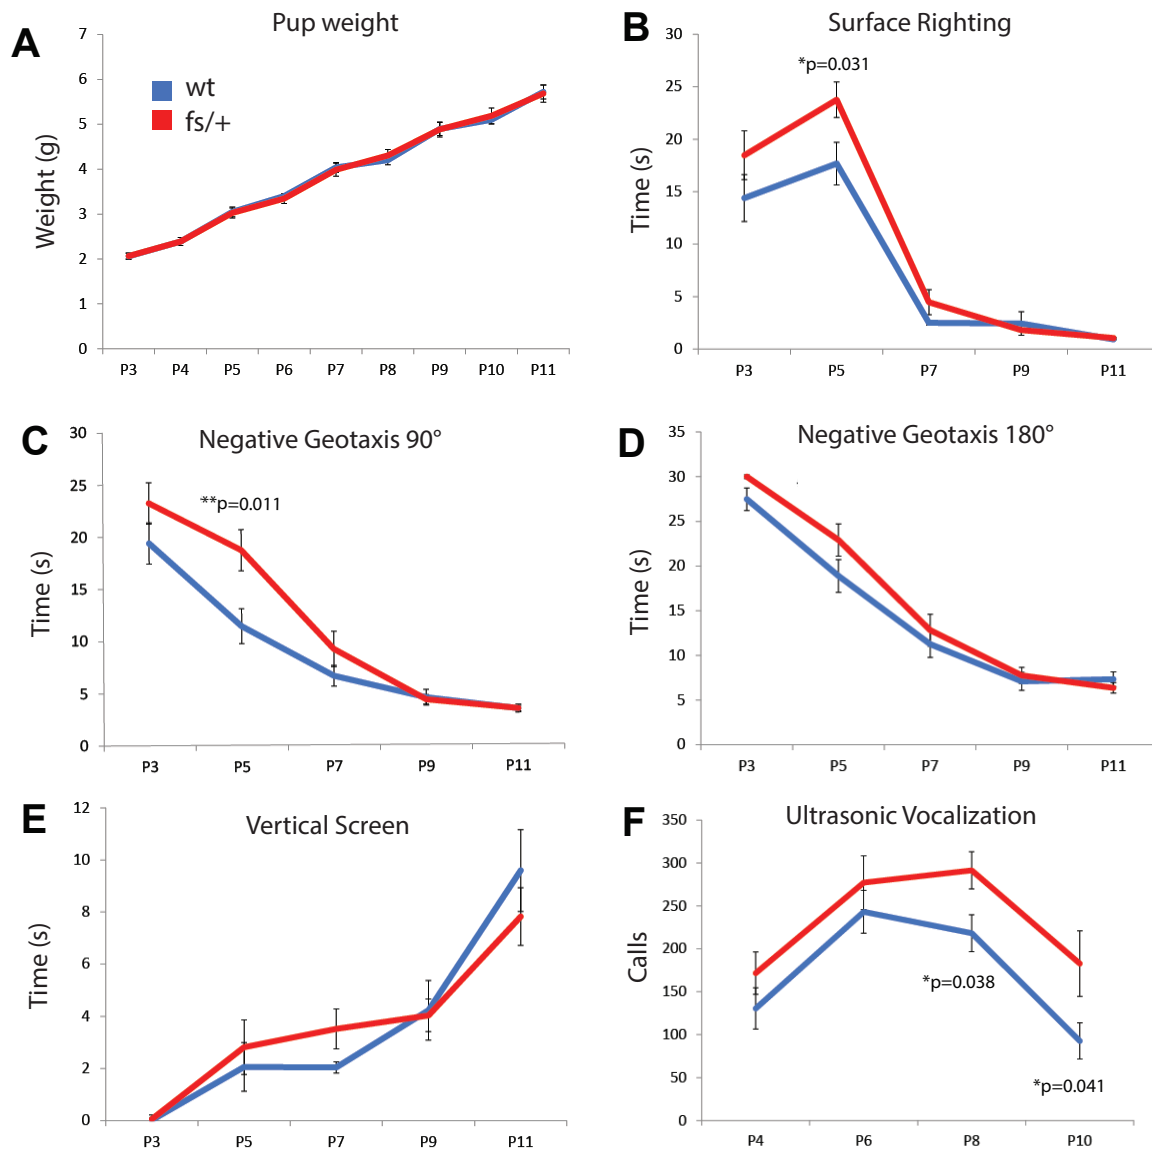

**Figure 2.** Developmental milestone and ultrasonic vocalization of *Arfgef1*<sup>fs/+</sup> pups. **A**, The weight of *Arfgef1*<sup>fs/+</sup> and wildtype pups from PND3 to PND11 is statistically similar. **B**, **C**, The time required for surface righting, negative geotaxis 90° of *Arfgef1*<sup>fs/+</sup> pups is statistically slower than wildtype at PND5. **D**, **E**, There is no difference observed in the time for *Arfgef1*<sup>fs/+</sup> and wildtype pups to accomplish negative geotaxis 180° task or to hold on a vertical screen. **F**, The ultrasonic calls are statistically higher at PND8 and PND10 for *Arfgef1*<sup>fs/+</sup> pups compared to wildtype pups. Data are collected from pups of both sexes. wildtype, n=22 animals; *Arfgef1*<sup>fs/+</sup>, n=23 animals from 7 litters. Permutation p-values shown were determined using the Wilcoxon rank-sum test.



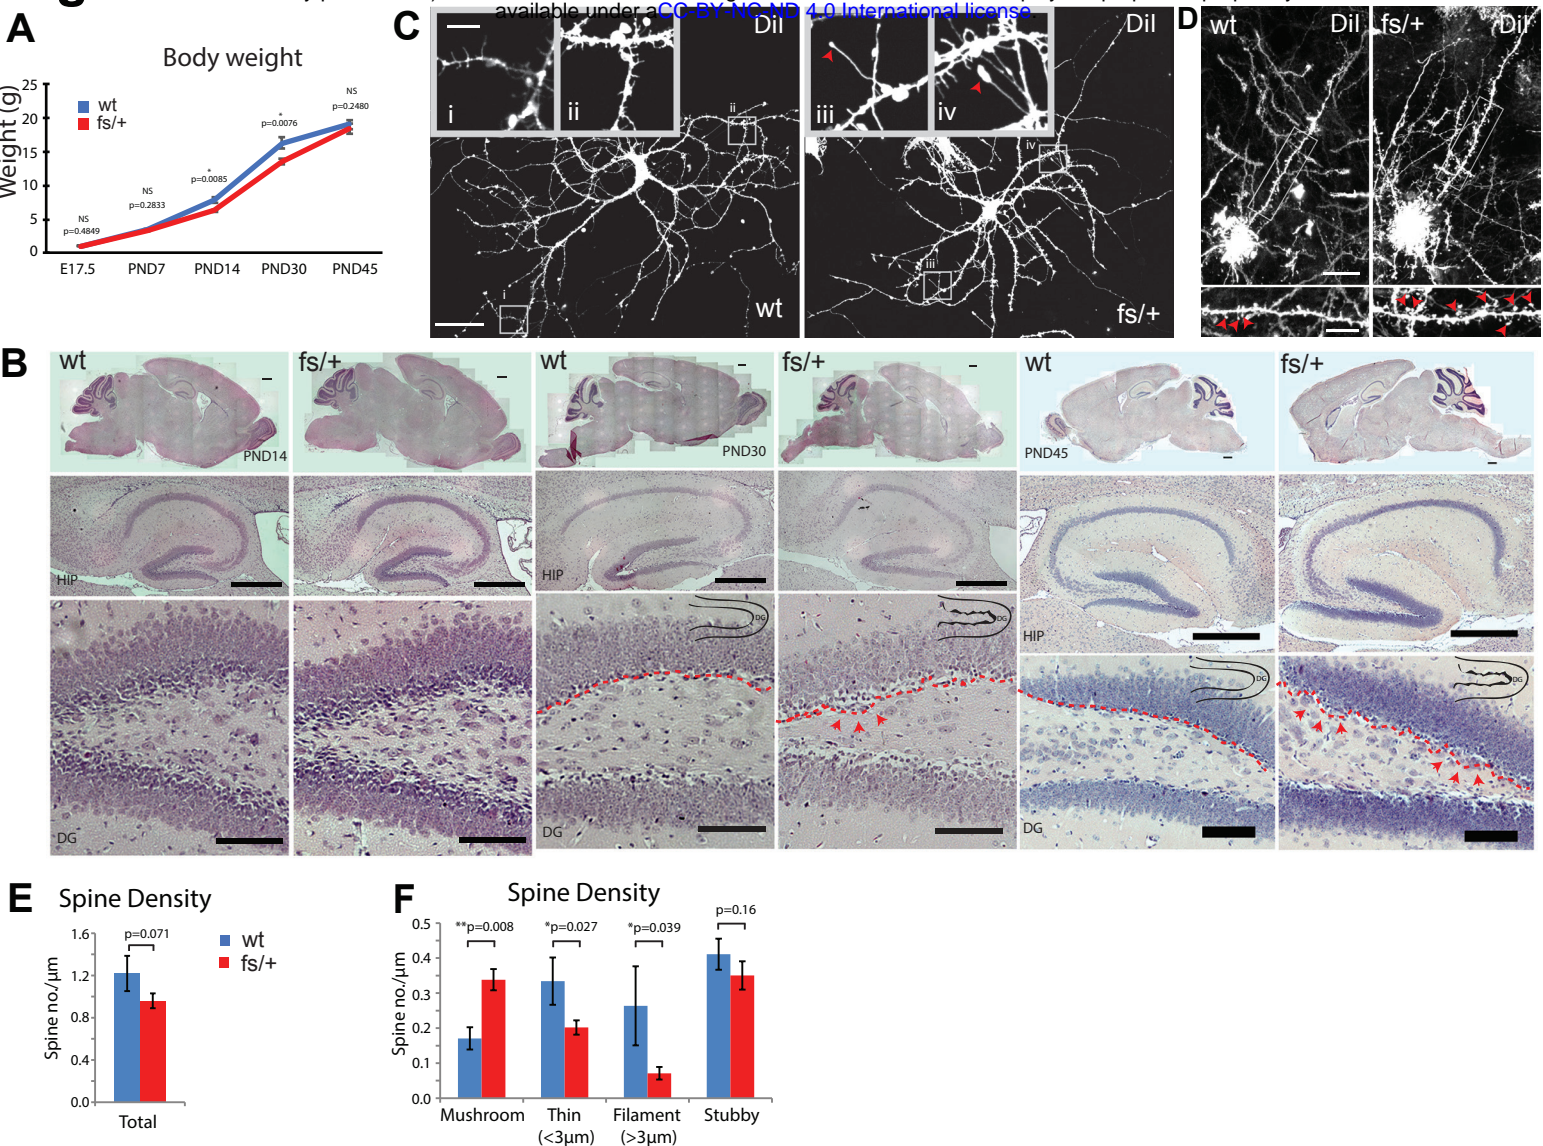

**Figure 3. Morphological characterization of *Arfgef1*<sup>fs/+</sup> mice.** **A**, The body weight of *Arfgef1*<sup>fs/+</sup> mice is statistically lower at PND14 and PND30 compared to wildtype mice. E17.5, wildtype, n=16; *Arfgef1*<sup>fs/+</sup>, n=12 from 4 litters; PND14, 30 and 45, wildtype, n=7 mice; *Arfgef1*<sup>fs/+</sup>, n=8 mice from 5 litters. **B**, The HE-stained sagittal sections shows irregular bumps (red arrowheads) along *Arfgef1*<sup>fs/+</sup> dentate gyrus lining (red dotted lines) at PND30 and PND45. n=3 animals per genotype for each time-point. Scale bars, sagittal sections, 500 μm; HIP, 500 μm; DG, 100 μm. **C**, In DIV14 culture, there are filamentous tertiary structures with large growth cones (red arrowheads) appeared on *Arfgef1*<sup>fs/+</sup> neurons. wildtype, 4 neurons from 1 animals; *Arfgef1*<sup>fs/+</sup>, n=11 neurons from 3 animals. Scale bars, 50 μm; inset, 10 μm. **D**, Single deep layer neuron is labeled using diolistic method in PND14 deep layer neurons. Mushroom spines were marked by red arrowheads. **E & F**, The total spine density is similar between *Arfgef1*<sup>fs/+</sup> neurons and wildtype neurons. However, spine subtype density (mushroom, thin and filament) are significantly different. Wildtype and *Arfgef1*<sup>fs/+</sup>, n=3 animals each. Scale bars, 20 μm; enlarged box, 10 μm. Data are collected from mice of both sexes. HIP, hippocampus; DG, dentate gyrus.

## Figure 4

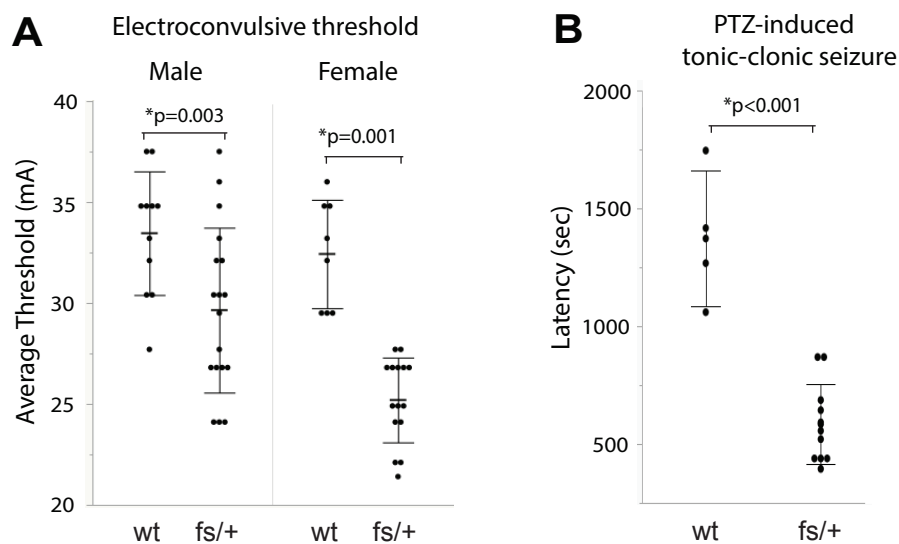

**Figure 4.** Seizure susceptibility of *Arfgef1*<sup>fs/+</sup> mice. **A**, Electroconvulsive threshold to the minimal clonic seizure endpoint is significantly lower in *Arfgef1*<sup>fs/+</sup> mice of both sexes (male, wildtype, n=11; *Arfgef1*<sup>fs/+</sup>, n= 18; female, wildtype, n=11; *Arfgef1*<sup>fs/+</sup>, n= 15). **B**, The latency for PTZ-induced seizure is significantly lower for *Arfgef1*<sup>fs/+</sup> mice at 9- to 10-week old. wildtype, n=4; *Arfgef1*<sup>fs/+</sup>, n= 11. Permutation p-values shown were determined using the Wilcoxon rank-sum test.

# Figure 5

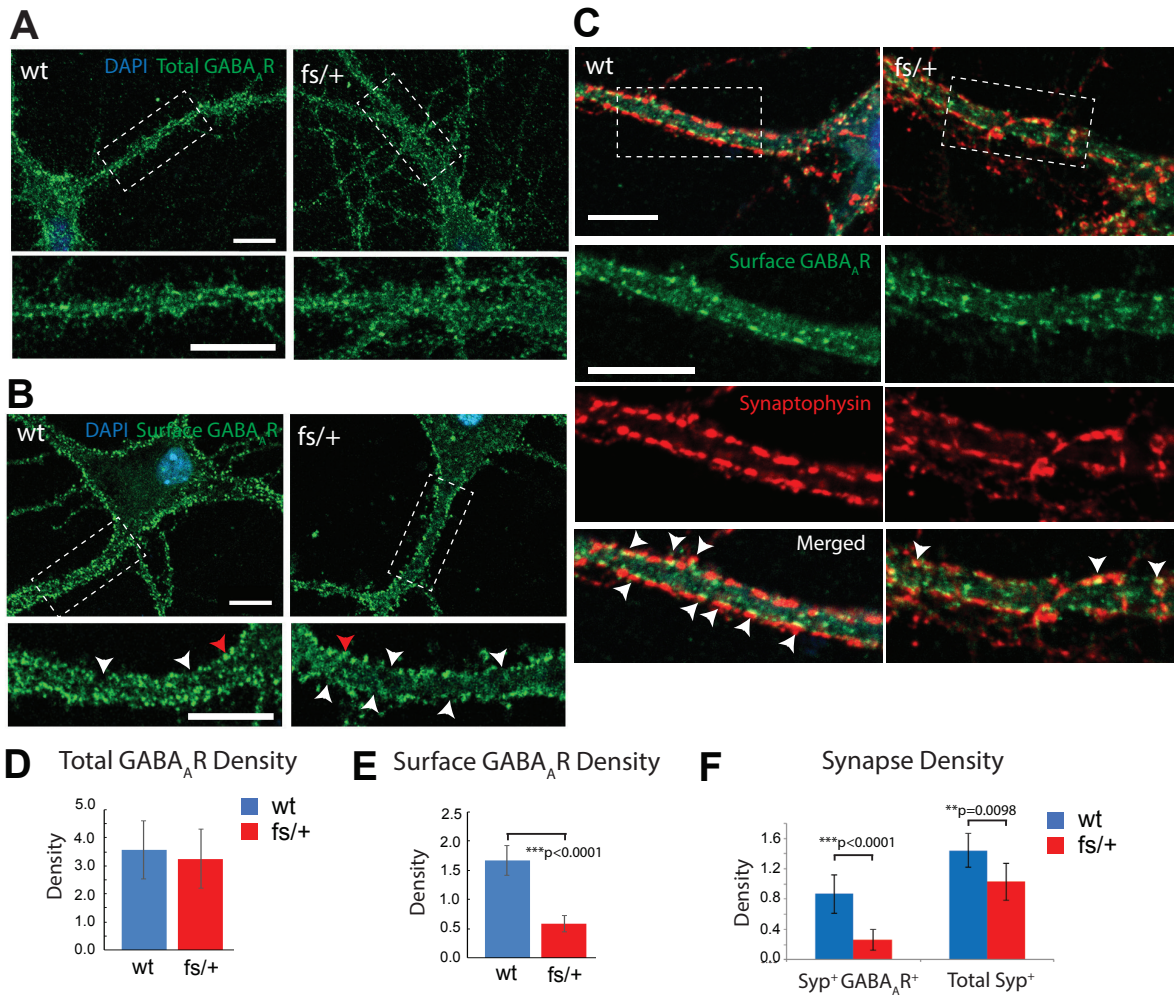

**Figure 5.** Membrane surface GABA<sub>A</sub>R and synaptic GABA<sub>A</sub>R distribution in *Arfgefl*<sup>fs/+</sup> neurons.

**A**, There is no difference in the localization of total GABA<sub>A</sub>R puncta in proximal dendrite. **B**, GABA<sub>A</sub>R localize on dendritic surface (representative punctum pointed by red arrowheads) at DIV14. The region without GABA<sub>A</sub>R puncta on dendritic surface are marked by white arrowheads. Surface GABA<sub>A</sub>R, wildtype, n=19:4 (# neurons:# mice); *Arfgefl*<sup>fs/+</sup>, n=23:7. Total GABA<sub>A</sub>R, wildtype, n=19:4; *Arfgefl*<sup>fs/+</sup>, n=23:7. All scale bars, 10 μm. **C**, At DIV14, the synaptic GABA<sub>A</sub>R puncta (white arrowheads) on dendritic surface reduced on *Arfgefl*<sup>fs/+</sup> dendrite. wildtype, n=19:4; *Arfgefl*<sup>fs/+</sup>, n=12:4. All scale bars, 10 μm. **D**, **E**, Graphs show quantification of the dendritic surface GABA<sub>A</sub>R density and total GABA<sub>A</sub>R density in dendrite. **F**, Graph shows the synaptic GABA<sub>A</sub>R density and total synapse density on dendritic surface. Density is defined as punctum number per dendritic length in μm.



# Figure 6

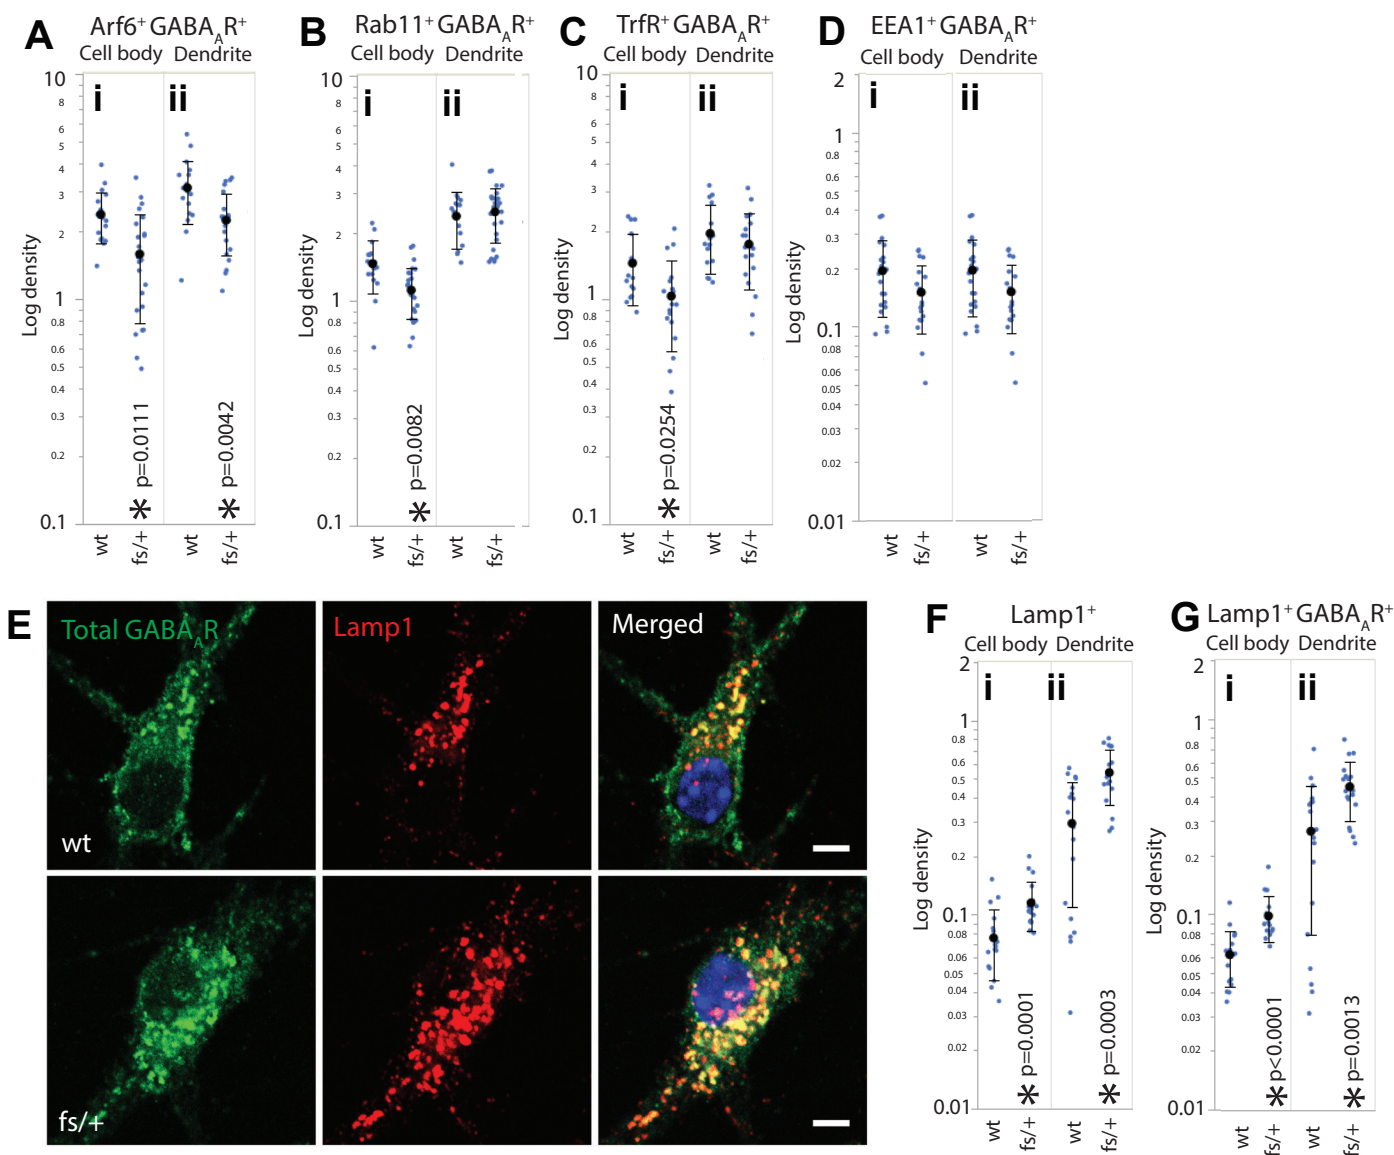

**Figure 6.** Distribution of intracellular vesicles colocalized with GABA<sub>A</sub>R in wildtype and *Arfgef1*<sup>fs/+</sup> DIV14 neurons. **A, B, C, D**, Graphs show the density of GABA<sub>A</sub>R colocalized with Arf6<sup>+</sup>, Rab11<sup>+</sup>, TrfR<sup>+</sup> recycling endosomes and EEA1<sup>+</sup> early endosomes in cell body and dendrite. Densities are displayed in log scale. Density in cell body and dendrite is defined as colocalized punctum number per cell body area (μm<sup>2</sup>) and the punctum number per dendritic length (μm) respectively. Arf6<sup>+</sup>, wildtype, n=19:4 (# neurons:# mice); *Arfgef1*<sup>fs/+</sup>, n=23:7. Rab11<sup>+</sup>, wildtype, n=16:4; *Arfgef1*<sup>fs/+</sup>, n=27:7; TrfR<sup>+</sup>, wildtype, n=15 :4; *Arfgef1*<sup>fs/+</sup>, n=18:3; EEA1<sup>+</sup>, wildtype, n=21:6; *Arfgef1*<sup>fs/+</sup>, n=19:5. **E**, The number of Lamp<sup>+</sup> lysosomes and GABA<sub>A</sub>R-containing lysosomes increase in *Arfgef1*<sup>fs/+</sup> neurons. **F & G**, Graphs show the density of Lamp1<sup>+</sup> lysosome and Lamp1<sup>+</sup>GABA<sub>A</sub>R<sup>+</sup> lysosomes in the cell body or dendrite. wildtype, n=18:6; *Arfgef1*<sup>fs/+</sup>, n=18:5. All scale bars, 5 μm. Density is shown in log scale. Vesicle densities in cell body and dendrite are defined as punctum number per cell body area (μm<sup>2</sup>) and the punctum number per dendritic length (μm) respectively.
